# Supplementary material for: Structure Modification of an Active Azo-Compound as a Route to New Antimicrobial Compounds
Source: MDPI journal article supplement (doi:10.3390/molecules22060875), 2017-05-25
Supplement: s1 [file s1]

# Supplementary Materials

## Structure modification of an active azo-compound as a route to new antimicrobial compounds

**Simona Concilio<sup>a,\*</sup>, Lucia Sessa<sup>b</sup>, Anna Maria Petrone<sup>b,c</sup>, Amalia Porta<sup>b</sup>, Rosita Diana<sup>d</sup>, Pio Iannelli<sup>b</sup> and Stefano Piotto<sup>b</sup>**

<sup>a</sup> Department of Industrial Engineering, University of Salerno, Via Giovanni Paolo II 132, 84084 Fisciano (SA), Italy

<sup>b</sup> Department of Pharmacy, University of Salerno, Via Giovanni Paolo II 132, 84084 Fisciano (SA), Italy

<sup>c</sup> PhD Program in Drug Discovery and Development, University of Salerno, Via Giovanni Paolo II 132, 84084 Fisciano (SA), Italy

<sup>d</sup> Department of Chemical Science, University of Napoli "Federico II", Cupa Nuova Cintia, 21 - 80126 – Napoli, Italy

\* Correspondence: [sconcilio@unisa.it](mailto:sconcilio@unisa.it); Tel.: +39-089-964115

RP HPLC Chromatograms of compounds **3a-3g**, detected at 350 nm.

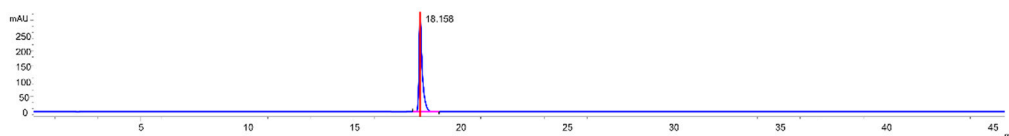

Figure S1 – Chromatogram of 3a

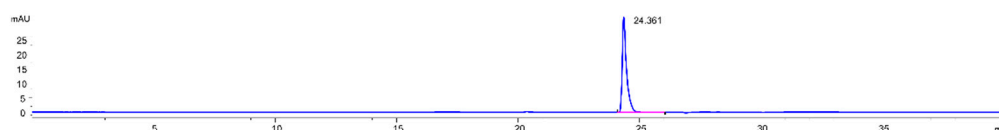

Figure S2 – Chromatogram of 3b

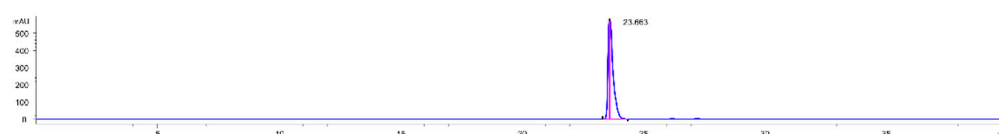

Figure S3 – Chromatogram of 3c

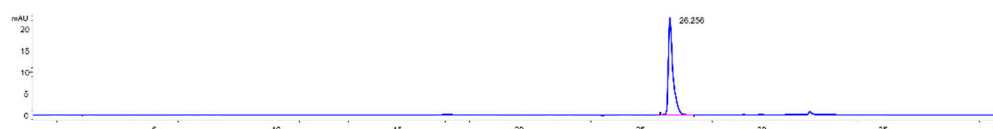

Figure S4 – Chromatogram of 3d

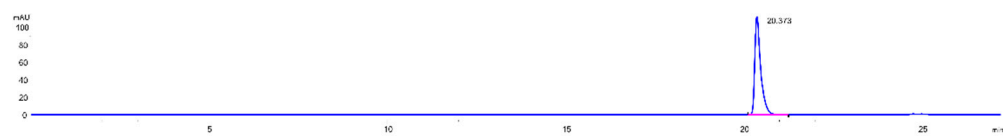

Figure S5 – Chromatogram of 3e

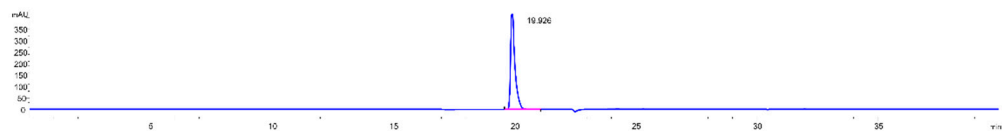

Figure S6 – Chromatogram of 3f

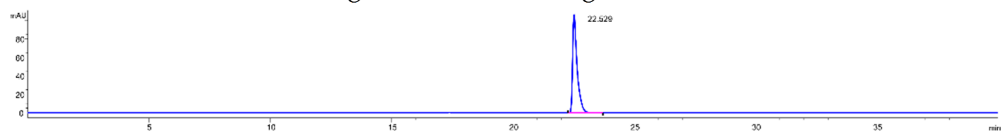

Figure S7 – Chromatogram of 3g
